# Supplementary material for: CTCF-mediated chromatin looping in EGR2 regulation and SUZ12 recruitment critical for peripheral myelination and repair
Source: PubMed Central journal article supplement (PMC7431862; doi:10.1038/s41467-020-17955-2), 2020-08-17
Supplement: 41467_2020_17955_MOESM1_ESM.pdf [file 41467_2020_17955_MOESM1_ESM.pdf]

**Supplementary information**

**CTCF-mediated chromatin looping in EGR2 regulation and SUZ12 recruitment critical for peripheral myelination and repair**

Wang et al.

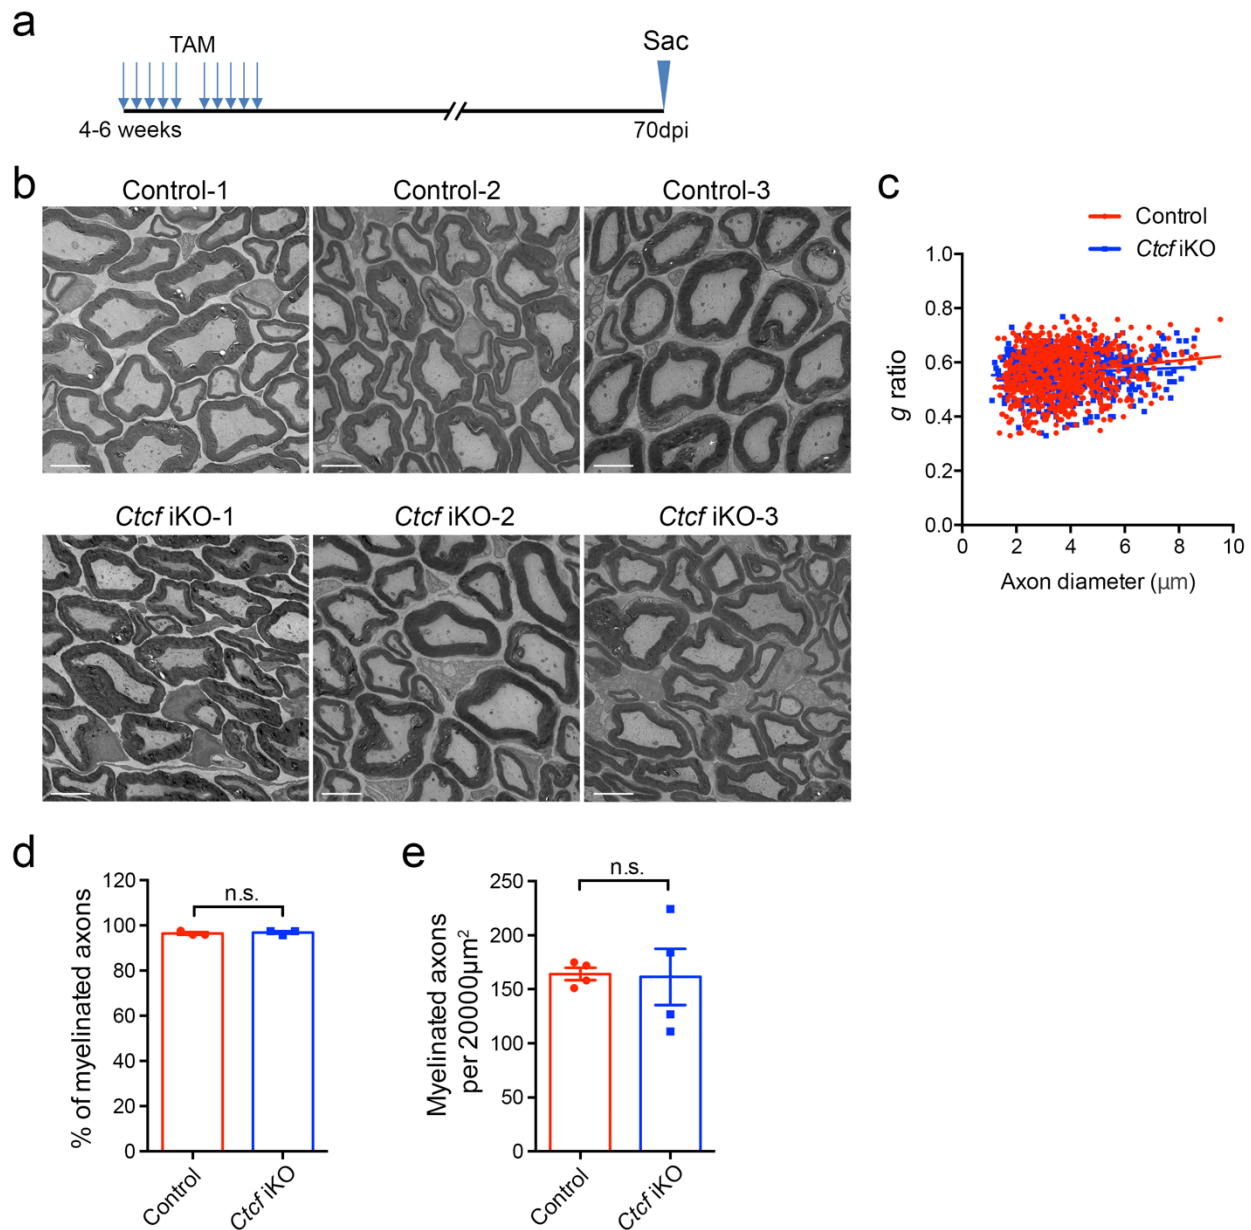

**Supplementary Fig. 1. CTCF is not required for myelin maintenance in adult peripheral nerves**

(a) A diagram showing the tamoxifen (TAM) administration scheme. Beginning at ~6 weeks of age, mice were treated with TAM via i.p. injection for 5 days with a 2-day break, and then treat again for 5 days. The nerves were analyzed at 70 days after the last injection.

(b) Representative EM images of cross sections of sciatic nerves from adult control and *Ctcf* iKO mice.  $n = 3$  animals/genotype. Scale bar: 6  $\mu\text{m}$ .

(c) Quantification of g ratios of axons from control and *Ctcf* iKO mice.  $n > 500$  axons from 3 control and 3 *Ctcf* iKO mice;  $P = 0.98$ .

(d) Percentage of the myelinated axons sciatic nerves from adult control and *Ctcf* iKO mice. n.s., no significance,  $n = 3$  animals/genotype,  $P = 0.66$ .

(e) Quantification of myelinated axon numbers per 2000  $\mu\text{m}^2$  sections of sciatic nerves from adult control and *Ctcf* iKO mice. n.s., no significance,  $n = 4$  animals/genotype,  $P = 0.93$ .

Data are presented as means  $\pm$  SEM., two-tailed unpaired Student's t-test.

Source data are provided as a Source Data file.

**a**

| Genes          | Control-1 | Control-2 | <i>Ctcf</i> cKO-1 | <i>Ctcf</i> cKO-2 | Fold change | Adjusted P-value |
|----------------|-----------|-----------|-------------------|-------------------|-------------|------------------|
| <i>Nfatc3</i>  | 9.79      | 10.28     | 12.56             | 12.50             | 1.07        | 0.456            |
| <i>Nfatc4</i>  | 3.28      | 3.45      | 3.19              | 4.29              | 0.95        | 0.876            |
| <i>Yap1</i>    | 27.41     | 29.33     | 35.73             | 35.76             | 1.08        | 0.509            |
| <i>Tead1</i>   | 52.86     | 48.62     | 50.15             | 50.07             | 0.85        | 0.126            |
| <i>Tead2</i> * | 11.89     | 12.31     | 26.21             | 26.65             | 1.88        | 0.000            |
| <i>Tead3</i> * | 12.55     | 12.29     | 6.24              | 6.28              | 0.43        | 0.000            |
| <i>Tead4</i> * | 4.49      | 3.68      | 1.60              | 1.22              | 0.30        | 0.000            |

\* FC > 1.5, and  $P < 0.5$ **b**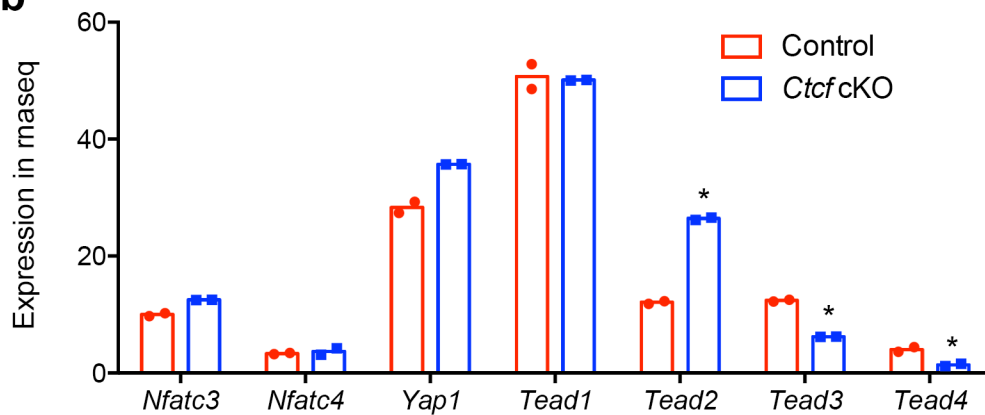**Supplementary Fig. 2. Expression of potential *Egr2* activating factors in *Ctcf* cKO sciatic nerves.**

(a,b) Expression values (FPKM) (a) or graph (b) of *Nfatc3/4*, *Yap1*, and *Tead1-4* genes from RNA-seq data in Control and *Ctcf* cKO sciatic nerves (n = 2 animals/genotype). \*, Fold change >1.5,  $P < 0.05$ , differential gene expression and statistical analysis were performed by the DEseq package.

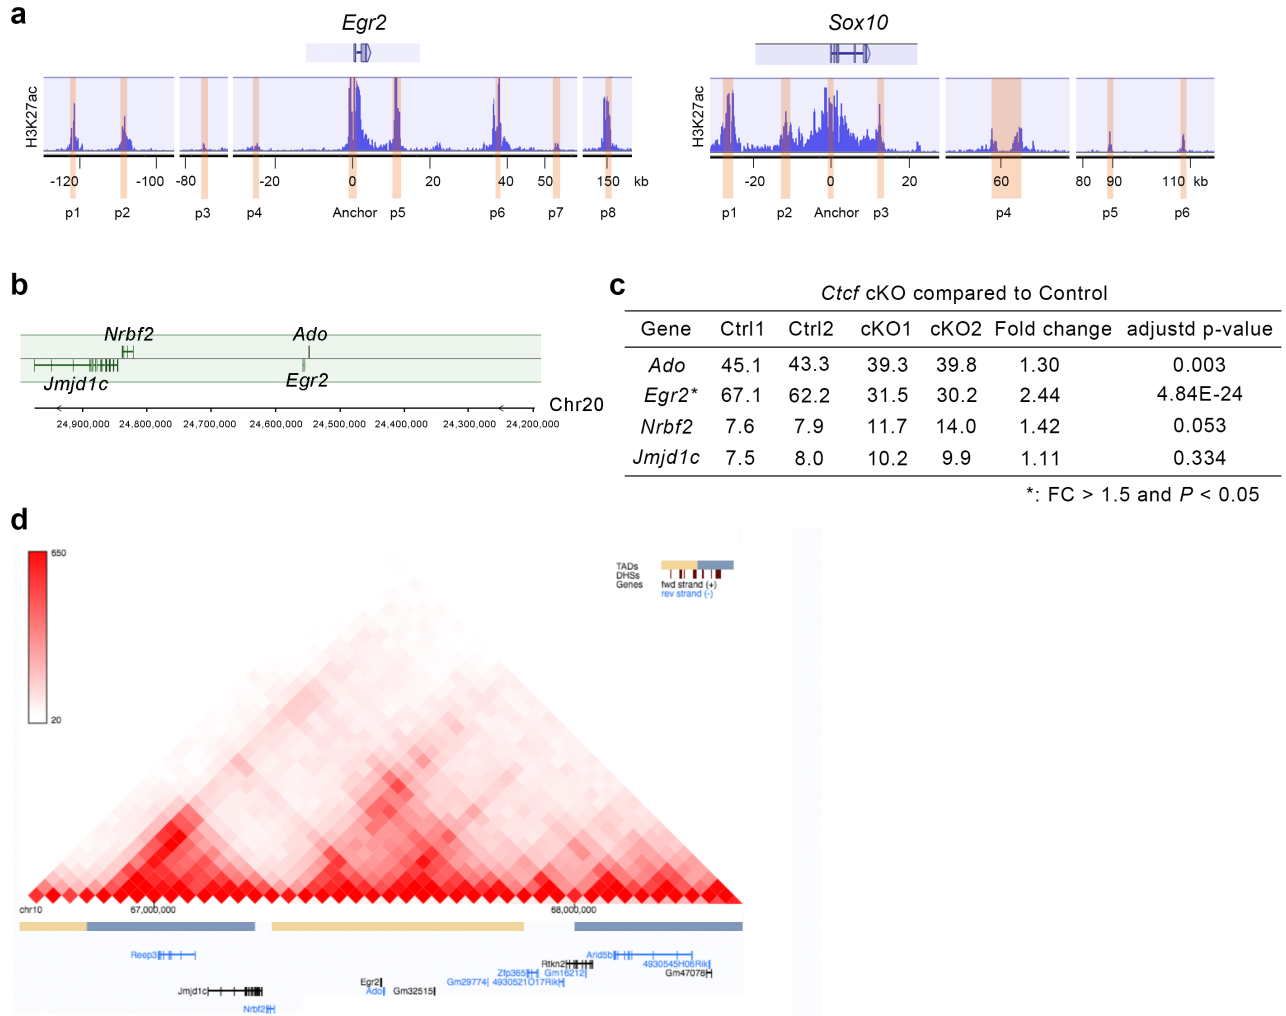

**Supplementary Fig. 3. Neighboring genes around *Egr2* are not affected by CTCF depletion.**

(a) Schematic of the *Egr2* and *Sox10* indicating the positions of the primers used in the 3C assays.

(b) Genome browser showing the locus of *Egr2* and neighboring genes.

(c) Gene expression of *Egr2*, *Ado*, *Nrbf2*, and *Jmjd1c* genes among RNA-seq data in Control and *Ctcf* cKO sciatic nerves. \*, Fold change >1.5,  $P < 0.05$ , differential gene expression and statistical analysis were performed by DEseq package.

(d) Snapshots of 1.72 Mb of Hi-C data at 40 kb resolution around *Egr2* gene loci in mouse neural progenitors (NPCs) derived from embryonic stem cells (mESCs) (<http://promoter.bx.psu.edu/hi-c/view.php>). The rectangle bars represent the topologically associating domains (TAD).

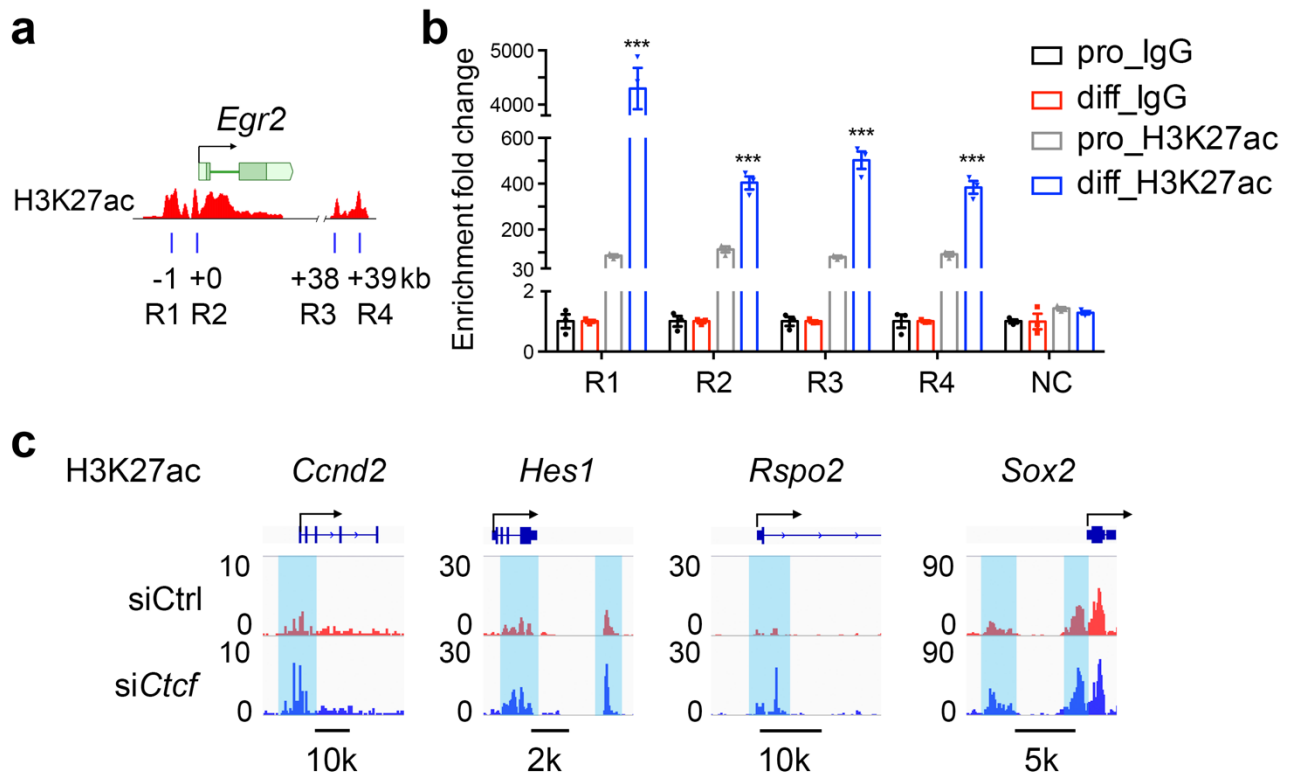

**Supplementary Fig. 4. H3K27ac activity around *Egr2* and differentiation inhibitory gene loci**

(a,b) Diagram of H3K27ac activity around the *Egr2* locus based on H3K27ac ChIP-seq profiles in differentiating SCs (a). ChIP-qPCR assay for H3K27ac enrichment in the promoter and enhancer elements of the *Egr2* locus in proliferative and differentiated SCs (b). Data are presented as means  $\pm$  SEM; The values of IgG were normalized to 1.  $n = 3$  independent experiments;  $***P < 0.01$ ; two-tailed unpaired Student's t test. R1-4, primer locations; NC, non-target genomic region control,  $P_{(R1)} = 0.00037$ ,  $P_{(R2)} = 0.00076$ ,  $P_{(R3)} = 0.00039$ ,  $P_{(R4)} = 0.00057$ ,  $P_{(NC)} = 0.17$ .

(c) Representative ChIP-seq tracks showing H3K27ac signals on SC differentiation inhibitory gene loci in control and siCtcf SCs.  $n = 1$  in each condition with 20 million cells.

Source data are provided as a Source Data file.

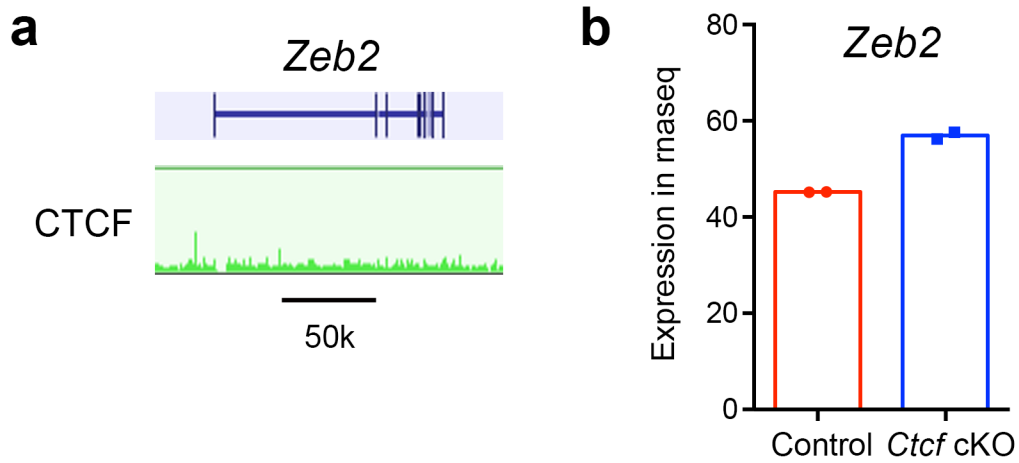

**Supplementary Fig. 5. Expression of SC regulatory genes in *Ctf* cKO sciatic nerves**

**(a)** Genome browser tracks over *Zeb2* loci with ChIP-seq density mapping of CTCF from SCs.

**(b)** Expression of *Zeb2* gene among RNA-seq data in control and *Ctf* cKO sciatic nerves (n = 2 animals/genotype).

Source data are provided as a Source Data file.
