# Supplementary material for: CTCF-mediated chromatin looping in EGR2 regulation and SUZ12 recruitment critical for peripheral myelination and repair
Source: PubMed Central journal article supplement (PMC7431862; doi:10.1038/s41467-020-17955-2), 2020-08-17
Supplement: 41467_2020_17955_MOESM2_ESM.pdf [file 41467_2020_17955_MOESM2_ESM.pdf]

## Description of Additional Supplementary Files

File Name: Supplementary Data 1

Description: Gene expression with differential chromatin accessibility

File Name: Supplementary Data 2

Description: Details of CTCF ChIP-seq peaks overlapped with either H3K27me3 or H3K27ac ChIP-seq peaks

File Name: Supplementary Data 3

Description: Upregulated genes in *siCtcf* SCs targeted by CTCF

File Name: Supplementary Data 4

Description: QC and sequence information for ATAC-seq and ChIP-seq
